# Supplementary material for: De Novo Analysis Reveals Transcriptomic Responses in Eriobotrya japonica Fruits during Postharvest Cold Storage
Source: PubMed Central journal article supplement (PMC6316545; doi:10.3390/genes9120639), 2018-12-17
Supplement: genes-09-00639-s001.pdf [file genes-09-00639-s001.pdf]

## Supplementary Materials

Table S1. Sequencing data statistics.

| Sample | Raw Reads  | Clean Reads (%)       | GC     | Clean Data (nt) | Q20 (%)                 | Q30 (%)                 |
|--------|------------|-----------------------|--------|-----------------|-------------------------|-------------------------|
| J00M-1 | 149590892  | 144811450<br>(96.8%)  | 48.13% | 20862967492     | 20179016146<br>(96.72%) | 18945722227<br>(90.81%) |
| J00M-2 | 126080430  | 121727188<br>(96.55%) | 46.52% | 17543618086     | 16968721135<br>(96.72%) | 15935525849<br>(90.83%) |
| J00M-3 | 113205034  | 109667224<br>(96.87%) | 46.43% | 16111894522     | 15749293635<br>(97.75%) | 15072712341<br>(93.55%) |
| J01M-1 | 119683630  | 115863224<br>(96.81%) | 46.43% | 16646832586     | 16110148996<br>(96.78%) | 15112440002<br>(90.78%) |
| J01M-2 | 123911050  | 118791508<br>(95.87%) | 46.51% | 16971145878     | 16367630961<br>(96.44%) | 15285957780<br>(90.07%) |
| J01M-3 | 142448062  | 138193074<br>(97.01%) | 47.43% | 19855343789     | 19213121904<br>(96.77%) | 18025034343<br>(90.78%) |
| J02M-1 | 121844734  | 115453510<br>(94.75%) | 46.14% | 16833436142     | 16438980310<br>(97.66%) | 15760324261<br>(93.63%) |
| J02M-2 | 124862008  | 120583974<br>(96.57%) | 46.56% | 17705344866     | 17370765233<br>(98.11%) | 16755127175<br>(94.63%) |
| J02M-3 | 123672616  | 119407688<br>(96.55%) | 46.89% | 17532827498     | 17201697590<br>(98.11%) | 16589459009<br>(94.62%) |
| J03M-1 | 128648556  | 123738840<br>(96.18%) | 46.31% | 18116830440     | 17750809588<br>(97.98%) | 17091023991<br>(94.34%) |
| J03M-2 | 127647894  | 124416522<br>(97.47%) | 46.54% | 18308570345     | 17960444198<br>(98.10%) | 17302510211<br>(94.50%) |
| J03M-3 | 124153748  | 121180036<br>(97.6%)  | 48.90% | 17851404343     | 17503452507<br>(98.05%) | 16836240818<br>(94.31%) |
| J04M-1 | 109276042  | 107087522<br>(98%)    | 47.25% | 15798808477     | 15526821931<br>(98.28%) | 14994738826<br>(94.91%) |
| J04M-2 | 137967834  | 131611748<br>(95.39%) | 46.53% | 18713013149     | 18007258920<br>(96.23%) | 16748202673<br>(89.50%) |
| J04M-3 | 151333842  | 145627326<br>(96.23%) | 47.86% | 20773772202     | 20029218376<br>(96.42%) | 18680077603<br>(89.92%) |
| J05M-1 | 131613502  | 125900828<br>(95.66%) | 47.36% | 17906681937     | 17231920337<br>(96.23%) | 16025801209<br>(89.50%) |
| J05M-2 | 133834768  | 128208156<br>(95.8%)  | 48.30% | 18230865699     | 17548226239<br>(96.26%) | 16328197015<br>(89.56%) |
| J05M-3 | 99790248   | 95543382<br>(95.74%)  | 47.20% | 13602759854     | 13100318985<br>(96.31%) | 12200732031<br>(89.69%) |
| Total  | 2289564890 | 2207813200            |        | 319366117305    |                         |                         |

**Table S2.** GO enrichment analysis of DEGs in Cellular Component.

| Stages         | Go ID      | Description                              | Gene Number | FDR         |
|----------------|------------|------------------------------------------|-------------|-------------|
| I <sup>1</sup> | GO:0031224 | intrinsic component of membrane          | 259         | 1.54E-11    |
|                | GO:0016020 | membrane                                 | 361         | 2.94E-09    |
|                | GO:0044425 | membrane part                            | 269         | 5.81E-08    |
|                | GO:0030312 | external encapsulating structure         | 41          | 0.000195606 |
|                | GO:0071944 | cell periphery                           | 43          | 0.000350184 |
| II             | GO:0031224 | intrinsic component of membrane          | 85          | 1.84E-14    |
|                | GO:0030312 | external encapsulating structure         | 18          | 2.45E-12    |
|                | GO:0016020 | membrane                                 | 120         | 8.83E-10    |
|                | GO:0044425 | membrane part                            | 91          | 0.00142213  |
|                | GO:0071944 | cell periphery                           | 18          | 0.002663931 |
| III            | GO:0016021 | integral component of membrane           | 5           | 0.011316755 |
|                | GO:0031224 | intrinsic component of membrane          | 40          | 0.011316755 |
|                | GO:0044434 | chloroplast part                         | 10          | 0.016488573 |
|                | GO:0044425 | membrane part                            | 42          | 0.016488573 |
|                | GO:0009507 | chloroplast                              | 10          | 0.016488573 |
|                | GO:0044435 | plastid part                             | 18          | 0.029140896 |
| IV             | GO:0005737 | cytoplasm                                | 35          | 0.001703956 |
|                | GO:0044444 | cytoplasmic part                         | 33          | 0.004101946 |
|                | GO:0005623 | cell                                     | 54          | 0.013077092 |
|                | GO:0044464 | cell part                                | 54          | 0.013077092 |
|                | GO:0009536 | plastid                                  | 21          | 0.014961503 |
|                | GO:0005576 | extracellular region                     | 5           | 0.015502068 |
|                | GO:0005622 | intracellular                            | 51          | 0.032508287 |
|                | GO:0005737 | cytoplasm                                | 36          | 2.15E-08    |
| V              | GO:0044444 | cytoplasmic part                         | 34          | 2.21E-07    |
|                | GO:0005623 | cell                                     | 46          | 1.83E-05    |
|                | GO:0044464 | cell part                                | 46          | 1.83E-05    |
|                | GO:0044424 | intracellular part                       | 45          | 1.92E-05    |
|                | GO:0005622 | intracellular                            | 45          | 2.29E-05    |
|                | GO:0009536 | plastid                                  | 22          | 4.00E-05    |
|                | GO:0043229 | intracellular organelle                  | 38          | 0.000369746 |
|                | GO:0043231 | intracellular membrane-bounded organelle | 35          | 0.000572207 |
|                | GO:0043226 | organelle                                | 38          | 0.000572207 |
|                | GO:0043227 | membrane-bounded organelle               | 35          | 0.001166744 |

<sup>1</sup> Stage I: 0 d vs 7 d, Stage II: 7 d vs 14 d, Stage III: 14 d vs 21 d, Stage IV: 21 d vs 28 d, Stage V: 28 d vs 35 d.

**Table S3.** GO enrichment analysis of DEGs in Molecular Function.

| Stages         | Go ID      | Description                                                                                           | Gene Number                                                                                                                                                                                       | FDR         |             |
|----------------|------------|-------------------------------------------------------------------------------------------------------|---------------------------------------------------------------------------------------------------------------------------------------------------------------------------------------------------|-------------|-------------|
| I <sup>1</sup> | GO:0016491 | oxidoreductase activity                                                                               | 178                                                                                                                                                                                               | 0.006002521 |             |
|                | GO:0016639 | oxidoreductase activity, acting on the CH-NH2 group of donors, NAD or NADP as acceptor                | 6                                                                                                                                                                                                 | 0.006002521 |             |
|                | GO:0004672 | protein kinase activity                                                                               | 127                                                                                                                                                                                               | 0.006588417 |             |
|                | GO:0016773 | phosphotransferase activity, alcohol group as acceptor                                                | 133                                                                                                                                                                                               | 0.006588417 |             |
|                | GO:0016301 | kinase activity                                                                                       | 160                                                                                                                                                                                               | 0.00998398  |             |
|                | GO:0016705 | oxidoreductase activity, acting on paired donors, with incorporation or reduction of molecular oxygen | 29                                                                                                                                                                                                | 0.014582235 |             |
|                | GO:0004553 | hydrolase activity, hydrolyzing O-glycosyl compounds                                                  | 37                                                                                                                                                                                                | 0.016140925 |             |
|                | GO:0015291 | secondary active transmembrane transporter activity                                                   | 21                                                                                                                                                                                                | 0.018281468 |             |
|                | GO:0046906 | tetrapyrrole binding                                                                                  | 46                                                                                                                                                                                                | 0.023845197 |             |
|                | GO:0016798 | hydrolase activity, acting on glycosyl bonds                                                          | 45                                                                                                                                                                                                | 0.023845197 |             |
|                | GO:0015926 | glucosidase activity                                                                                  | 14                                                                                                                                                                                                | 0.027667152 |             |
|                | GO:0043169 | cation binding                                                                                        | 276                                                                                                                                                                                               | 0.027667152 |             |
|                | GO:0032553 | ribonucleotide binding                                                                                | 10                                                                                                                                                                                                | 0.030994308 |             |
|                | GO:0005506 | iron ion binding                                                                                      | 4                                                                                                                                                                                                 | 0.034489888 |             |
|                | GO:0016679 | oxidoreductase activity, acting on diphenols and related substances as donors                         | 10                                                                                                                                                                                                | 0.034489888 |             |
|                | GO:0016682 | oxidoreductase activity, acting on diphenols and related substances as donors, oxygen as acceptor     | 10                                                                                                                                                                                                | 0.034489888 |             |
|                | GO:0052592 | oxidoreductase activity, acting on CH or CH2 groups, with an iron-sulfur protein as acceptor          | 5                                                                                                                                                                                                 | 0.034489888 |             |
|                | GO:0045181 | glutamate synthase activity, NAD(P)H as acceptor                                                      | 3                                                                                                                                                                                                 | 0.047983581 |             |
|                | II         | GO:0016706                                                                                            | oxidoreductase activity, acting on paired donors, with incorporation or reduction of molecular oxygen, 2-oxoglutarate as one donor, and incorporation of one atom each of oxygen into both donors | 6           | 0.011675432 |
|                |            | GO:0051213                                                                                            | dioxygenase activity                                                                                                                                                                              | 6           | 0.024158305 |
| III            | GO:0016651 | oxidoreductase activity, acting on NAD(P)H                                                            | 9                                                                                                                                                                                                 | 0.009442423 |             |
|                | GO:0016491 | oxidoreductase activity                                                                               | 35                                                                                                                                                                                                | 0.019997842 |             |
|                | GO:0048037 | cofactor binding                                                                                      | 9                                                                                                                                                                                                 | 0.026131361 |             |
|                | GO:0046906 | tetrapyrrole binding                                                                                  | 12                                                                                                                                                                                                | 0.028499899 |             |
|                | GO:0016679 | oxidoreductase activity, acting on diphenols and related substances as donors                         | 4                                                                                                                                                                                                 | 0.039263091 |             |
|                | GO:0016682 | oxidoreductase activity, acting on diphenols and related substances as donors, oxygen as acceptor     | 4                                                                                                                                                                                                 | 0.039263091 |             |
| IV             | GO:0016491 | oxidoreductase activity                                                                               | 24                                                                                                                                                                                                | 0.003945661 |             |
| V              | GO:0016491 | oxidoreductase activity                                                                               | 21                                                                                                                                                                                                | 0.006166828 |             |
|                | GO:0000104 | succinate dehydrogenase activity                                                                      | 2                                                                                                                                                                                                 | 0.041394045 |             |

<sup>1</sup> Stage I: 0 d vs 7 d, Stage II: 7 d vs 14 d, Stage III: 14 d vs 21 d, Stage IV: 21 d vs 28 d, Stage V: 28 d vs 35 d.

**Table S4.** GO enrichment analysis of DEGs in Biological Process.

| <b>Stages</b>  | <b>Go ID</b> | <b>Description</b>                   | <b>Gene Number</b> | <b>FDR</b>  |
|----------------|--------------|--------------------------------------|--------------------|-------------|
| I <sup>1</sup> | GO:0006595   | polyamine metabolic process          | 9                  | 0.049998197 |
| II             | N/A          |                                      |                    |             |
| III            | N/A          |                                      |                    |             |
| IV             | N/A          |                                      |                    |             |
| V              | GO:0044281   | small molecule metabolic process     | 24                 | 0.021550796 |
|                | GO:0044283   | small molecule biosynthetic process  | 9                  | 0.03611903  |
|                | GO:0006101   | citrate metabolic process            | 4                  | 0.03611903  |
|                | GO:0072350   | tricarboxylic acid metabolic process | 4                  | 0.03611903  |
|                | GO:0043436   | oxoacid metabolic process            | 17                 | 0.036879098 |
|                | GO:0006082   | organic acid metabolic process       | 17                 | 0.036879098 |

<sup>1</sup> Stage I: 0 d vs 7 d, Stage II: 7 d vs 14 d, Stage III: 14 d vs 21 d, Stage IV: 21 d vs 28 d, Stage V: 28 d vs 35 d.

Table S5. KEGG enrichment analysis of DEGs.

| Stages         | Pathway ID | Pathway                                       | Gene Number                   | FDR      |          |
|----------------|------------|-----------------------------------------------|-------------------------------|----------|----------|
| I <sup>1</sup> | ko04075    | Plant hormone signal transduction             | 75                            | 7.67E-06 |          |
|                | ko00940    | Phenylpropanoid biosynthesis                  | 46                            | 3.24E-04 |          |
|                | ko00900    | Terpenoid backbone biosynthesis               | 29                            | 3.24E-04 |          |
|                | ko00592    | alpha-Linolenic acid metabolism               | 28                            | 5.84E-04 |          |
|                | ko00909    | Sesquiterpenoid and triterpenoid biosynthesis | 12                            | 5.84E-04 |          |
|                | ko00910    | Nitrogen metabolism                           | 22                            | 1.26E-03 |          |
|                | ko00906    | Carotenoid biosynthesis                       | 16                            | 2.41E-03 |          |
|                | ko00514    | Other types of O-glycan biosynthesis          | 10                            | 9.67E-03 |          |
|                | ko00072    | Synthesis and degradation of ketone bodies    | 6                             | 1.06E-02 |          |
|                | ko00905    | Brassinosteroid biosynthesis                  | 8                             | 2.83E-02 |          |
|                | ko04146    | Peroxisome                                    | 33                            | 2.83E-02 |          |
|                | ko04626    | Plant-pathogen interaction                    | 51                            | 2.93E-02 |          |
|                | ko00071    | Fatty acid degradation                        | 24                            | 2.93E-02 |          |
|                | ko00500    | Starch and sucrose metabolism                 | 61                            | 3.55E-02 |          |
|                | ko00052    | Galactose metabolism                          | 20                            | 3.90E-02 |          |
|                | ko00100    | Steroid biosynthesis                          | 15                            | 4.73E-02 |          |
|                | ko04712    | Circadian rhythm - plant                      | 15                            | 4.73E-02 |          |
|                | II         | ko00940                                       | Phenylpropanoid biosynthesis  | 24       | 7.67E-05 |
|                |            | ko00906                                       | Carotenoid biosynthesis       | 10       | 8.20E-04 |
|                |            | ko00500                                       | Starch and sucrose metabolism | 27       | 3.23E-02 |
| ko00520        |            | Amino sugar and nucleotide sugar metabolism   | 18                            | 4.55E-02 |          |
| ko00903        |            | Limonene and pinene degradation               | 4                             | 4.62E-02 |          |
| ko00040        |            | Pentose and glucuronate interconversions      | 13                            | 4.62E-02 |          |
| ko00909        |            | Sesquiterpenoid and triterpenoid biosynthesis | 7                             | 1.03E-05 |          |
| III            | ko00940    | Phenylpropanoid biosynthesis                  | 14                            | 1.17E-04 |          |
|                | ko00072    | Synthesis and degradation of ketone bodies    | 4                             | 4.62E-04 |          |
|                | ko00900    | Terpenoid backbone biosynthesis               | 9                             | 6.85E-04 |          |
|                | ko04626    | Plant-pathogen interaction                    | 15                            | 8.24E-04 |          |
|                | ko00100    | Steroid biosynthesis                          | 6                             | 6.11E-03 |          |
|                | ko00280    | Valine, leucine and isoleucine degradation    | 8                             | 1.37E-02 |          |
|                | ko00650    | Butanoate metabolism                          | 4                             | 3.86E-02 |          |
|                | ko01200    | Carbon metabolism                             | 33                            | 8.53E-07 |          |
| IV             | ko01230    | Biosynthesis of amino acids                   | 28                            | 6.22E-06 |          |
|                | ko00020    | Citrate cycle (TCA cycle)                     | 13                            | 1.26E-04 |          |
|                | ko00630    | Glyoxylate and dicarboxylate metabolism       | 12                            | 6.07E-04 |          |
|                | ko00620    | Pyruvate metabolism                           | 14                            | 6.07E-04 |          |
|                | ko01210    | 2-Oxocarboxylic acid metabolism               | 10                            | 1.91E-03 |          |
|                | ko00710    | Carbon fixation in photosynthetic organisms   | 10                            | 4.70E-03 |          |
|                | ko00030    | Pentose phosphate pathway                     | 8                             | 8.30E-03 |          |
|                | ko00290    | Valine, leucine and isoleucine biosynthesis   | 5                             | 1.10E-02 |          |
|                | V          | ko01200                                       | Carbon metabolism             | 35       | 1.65E-09 |
|                |            | ko01230                                       | Biosynthesis of amino acids   | 28       | 4.22E-07 |
| ko00020        |            | Citrate cycle (TCA cycle)                     | 13                            | 3.23E-05 |          |
| ko00620        |            | Pyruvate metabolism                           | 14                            | 1.93E-04 |          |
| ko00710        |            | Carbon fixation in photosynthetic organisms   | 10                            | 2.45E-03 |          |
| ko01210        |            | 2-Oxocarboxylic acid metabolism               | 9                             | 3.61E-03 |          |
| ko00030        |            | Pentose phosphate pathway                     | 8                             | 4.19E-03 |          |
| ko00010        |            | Glycolysis / Gluconeogenesis                  | 12                            | 6.22E-03 |          |
| ko00290        |            | Valine, leucine and isoleucine biosynthesis   | 5                             | 6.28E-03 |          |

|         |                                                     |    |          |
|---------|-----------------------------------------------------|----|----------|
| ko00630 | Glyoxylate and dicarboxylate metabolism             | 9  | 8.26E-03 |
| ko01220 | Degradation of aromatic compounds                   | 3  | 1.29E-02 |
| ko00920 | Sulfur metabolism                                   | 6  | 2.27E-02 |
| ko00230 | Purine metabolism                                   | 13 | 2.44E-02 |
| ko00400 | Phenylalanine, tyrosine and tryptophan biosynthesis | 5  | 4.57E-02 |

---

<sup>1</sup> Stage I: 0 d vs 7 d, Stage II: 7 d vs 14 d, Stage III: 14 d vs 21 d, Stage IV: 21 d vs 28 d, Stage V: 28 d vs 35 d.

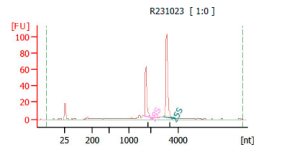

**Overall Results for sample 1 :** R231023

RNA Area: 227.2  
 RNA Concentration: 171 ng/μl  
 rRNA Ratio [25s / 18s]: 1.8  
 RNA Integrity Number (RIN): 9.6 (8.02,08)  
 Result Flagging Color:    
 Result Flagging Label: RIN: 9.60

**Fragment table for sample 1 :** R231023

| Name | Start Size [nt] | End Size [nt] | Area | % of total Area |
|------|-----------------|---------------|------|-----------------|
| 18S  | 1,694           | 2,077         | 53.8 | 23.7            |
| 25S  | 2,853           | 3,831         | 96.9 | 43.5            |

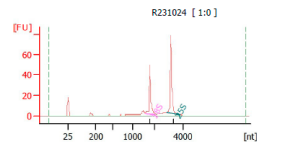

**Overall Results for sample 2 :** R231024

RNA Area: 182.5  
 RNA Concentration: 137 ng/μl  
 rRNA Ratio [25s / 18s]: 1.5  
 RNA Integrity Number (RIN): 9.7 (8.02,08)  
 Result Flagging Color:    
 Result Flagging Label: RIN: 9.70

**Fragment table for sample 2 :** R231024

| Name | Start Size [nt] | End Size [nt] | Area | % of total Area |
|------|-----------------|---------------|------|-----------------|
| 18S  | 1,545           | 2,067         | 47.5 | 26.0            |
| 25S  | 2,838           | 3,824         | 73.4 | 40.2            |

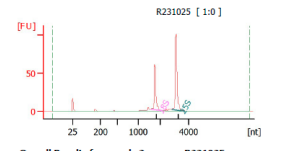

**Overall Results for sample 3 :** R231025

RNA Area: 220.4  
 RNA Concentration: 165 ng/μl  
 rRNA Ratio [25s / 18s]: 1.7  
 RNA Integrity Number (RIN): 9.8 (8.02,08)  
 Result Flagging Color:    
 Result Flagging Label: RIN: 9.80

**Fragment table for sample 3 :** R231025

| Name | Start Size [nt] | End Size [nt] | Area | % of total Area |
|------|-----------------|---------------|------|-----------------|
| 18S  | 1,552           | 2,100         | 57.6 | 26.1            |
| 25S  | 2,795           | 3,744         | 96.0 | 43.6            |

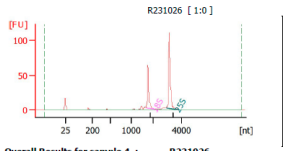

**Overall Results for sample 4 :** R231026

RNA Area: 228.2  
 RNA Concentration: 171 ng/μl  
 rRNA Ratio [25s / 18s]: 1.9  
 RNA Integrity Number (RIN): 9.5 (8.02,08)  
 Result Flagging Color:    
 Result Flagging Label: RIN: 9.50

**Fragment table for sample 4 :** R231026

| Name | Start Size [nt] | End Size [nt] | Area | % of total Area |
|------|-----------------|---------------|------|-----------------|
| 18S  | 1,691           | 2,048         | 52.7 | 23.1            |
| 25S  | 2,893           | 3,864         | 99.6 | 43.6            |

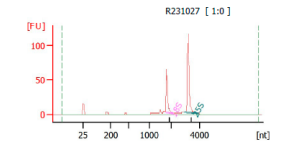

**Overall Results for sample 5 :** R231027

RNA Area: 224.7  
 RNA Concentration: 169 ng/μl  
 rRNA Ratio [25s / 18s]: 1.9  
 RNA Integrity Number (RIN): 9.6 (8.02,08)  
 Result Flagging Color:    
 Result Flagging Label: RIN: 9.60

**Fragment table for sample 5 :** R231027

| Name | Start Size [nt] | End Size [nt] | Area  | % of total Area |
|------|-----------------|---------------|-------|-----------------|
| 18S  | 1,714           | 2,136         | 53.8  | 24.0            |
| 25S  | 2,906           | 3,913         | 103.9 | 46.2            |

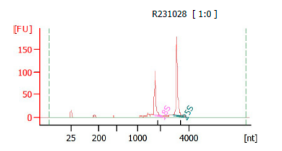

**Overall Results for sample 6 :** R231028

RNA Area: 346.5  
 RNA Concentration: 259 ng/μl  
 rRNA Ratio [25s / 18s]: 1.9  
 RNA Integrity Number (RIN): 9.6 (8.02,08)  
 Result Flagging Color:    
 Result Flagging Label: RIN: 9.60

**Fragment table for sample 6 :** R231028

| Name | Start Size [nt] | End Size [nt] | Area  | % of total Area |
|------|-----------------|---------------|-------|-----------------|
| 18S  | 1,700           | 2,096         | 84.5  | 24.5            |
| 25S  | 2,983           | 3,948         | 161.8 | 46.8            |

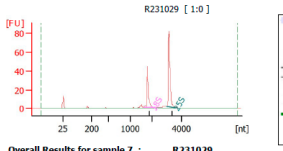

**Overall Results for sample 7 :** R231029

RNA Area: 157.8  
 RNA Concentration: 118 ng/μl  
 rRNA Ratio [25s / 18s]: 1.8  
 RNA Integrity Number (RIN): 9.8 (8.02,08)  
 Result Flagging Color:    
 Result Flagging Label: RIN: 9.80

**Fragment table for sample 7 :** R231029

| Name | Start Size [nt] | End Size [nt] | Area | % of total Area |
|------|-----------------|---------------|------|-----------------|
| 18S  | 1,598           | 2,211         | 41.0 | 26.0            |
| 25S  | 2,959           | 3,804         | 72.3 | 45.8            |

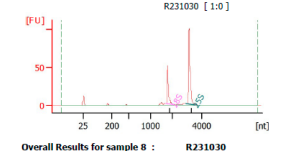

**Overall Results for sample 8 :** R231030

RNA Area: 194.0  
 RNA Concentration: 138 ng/μl  
 rRNA Ratio [25s / 18s]: 2.0  
 RNA Integrity Number (RIN): 9.5 (8.02,08)  
 Result Flagging Color:    
 Result Flagging Label: RIN: 9.50

**Fragment table for sample 8 :** R231030

| Name | Start Size [nt] | End Size [nt] | Area | % of total Area |
|------|-----------------|---------------|------|-----------------|
| 18S  | 1,703           | 2,066         | 44.2 | 24.0            |
| 25S  | 2,917           | 3,790         | 88.0 | 47.8            |

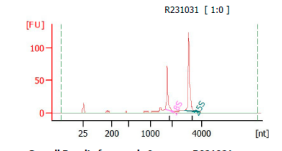

**Overall Results for sample 9 :** R231031

RNA Area: 257.9  
 RNA Concentration: 194 ng/μl  
 rRNA Ratio [25s / 18s]: 1.9  
 RNA Integrity Number (RIN): 9.5 (8.02,08)  
 Result Flagging Color:    
 Result Flagging Label: RIN: 9.50

**Fragment table for sample 9 :** R231031

| Name | Start Size [nt] | End Size [nt] | Area  | % of total Area |
|------|-----------------|---------------|-------|-----------------|
| 18S  | 1,596           | 2,058         | 61.1  | 23.7            |
| 25S  | 2,834           | 3,860         | 114.9 | 44.5            |

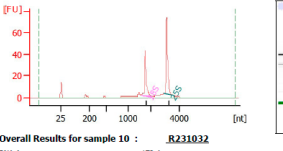

**Overall Results for sample 10 :** R231032

RNA Area: 172.4  
 RNA Concentration: 129 ng/μl  
 rRNA Ratio [25s / 18s]: 1.5  
 RNA Integrity Number (RIN): 9.5 (8.02,08)  
 Result Flagging Color:    
 Result Flagging Label: RIN: 9.50

**Fragment table for sample 10 :** R231032

| Name | Start Size [nt] | End Size [nt] | Area | % of total Area |
|------|-----------------|---------------|------|-----------------|
| 18S  | 1,574           | 2,101         | 42.7 | 24.8            |
| 25S  | 2,959           | 3,967         | 62.8 | 36.4            |

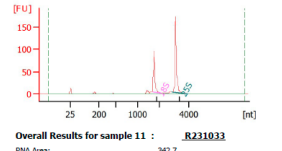

**Overall Results for sample 11 :** R231033

RNA Area: 342.7  
 RNA Concentration: 257 ng/μl  
 rRNA Ratio [25s / 18s]: 1.9  
 RNA Integrity Number (RIN): 9.6 (8.02,08)  
 Result Flagging Color:    
 Result Flagging Label: RIN: 9.60

**Fragment table for sample 11 :** R231033

| Name | Start Size [nt] | End Size [nt] | Area  | % of total Area |
|------|-----------------|---------------|-------|-----------------|
| 18S  | 1,677           | 2,058         | 82.2  | 24.0            |
| 25S  | 2,620           | 3,943         | 159.2 | 46.4            |

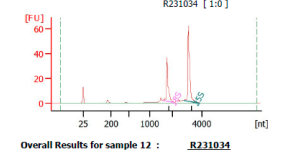

**Overall Results for sample 12 :** R231034

RNA Area: 155.9  
 RNA Concentration: 117 ng/μl  
 rRNA Ratio [25s / 18s]: 1.5  
 RNA Integrity Number (RIN): 9.4 (8.02,08)  
 Result Flagging Color:    
 Result Flagging Label: RIN: 9.40

**Fragment table for sample 12 :** R231034

| Name | Start Size [nt] | End Size [nt] | Area | % of total Area |
|------|-----------------|---------------|------|-----------------|
| 18S  | 1,558           | 2,116         | 38.5 | 24.7            |
| 25S  | 2,792           | 3,855         | 58.8 | 37.7            |

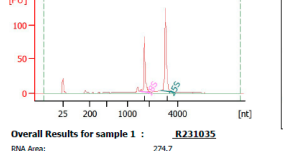

**Overall Results for sample 1 :** R231035

RNA Area: 274.7  
 RNA Concentration: 191 ng/μl  
 rRNA Ratio [25s / 18s]: 1.7  
 RNA Integrity Number (RIN): 10 (8.02,08)  
 Result Flagging Color:    
 Result Flagging Label: RIN: 10

**Fragment table for sample 1 :** R231035

| Name | Start Size [nt] | End Size [nt] | Area  | % of total Area |
|------|-----------------|---------------|-------|-----------------|
| 18S  | 1,543           | 2,075         | 76.6  | 27.9            |
| 25S  | 2,779           | 3,806         | 126.6 | 46.1            |

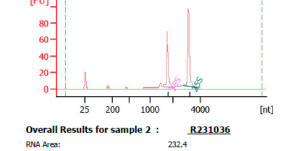

**Overall Results for sample 2 :** R231036

RNA Area: 232.4  
 RNA Concentration: 181 ng/μl  
 rRNA Ratio [25s / 18s]: 1.5  
 RNA Integrity Number (RIN): 9.9 (8.02,08)  
 Result Flagging Color:    
 Result Flagging Label: RIN: 9.90

**Fragment table for sample 2 :** R231036

| Name | Start Size [nt] | End Size [nt] | Area | % of total Area |
|------|-----------------|---------------|------|-----------------|
| 18S  | 1,549           | 2,093         | 62.9 | 27.1            |
| 25S  | 2,792           | 3,789         | 96.6 | 41.6            |

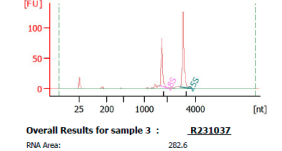

**Overall Results for sample 3 :** R231037

RNA Area: 282.6  
 RNA Concentration: 196 ng/μl  
 rRNA Ratio [25s / 18s]: 1.8  
 RNA Integrity Number (RIN): 9.6 (8.02,08)  
 Result Flagging Color:    
 Result Flagging Label: RIN: 9.60

**Fragment table for sample 3 :** R231037

| Name | Start Size [nt] | End Size [nt] | Area  | % of total Area |
|------|-----------------|---------------|-------|-----------------|
| 18S  | 1,706           | 2,027         | 66.5  | 23.5            |
| 25S  | 2,875           | 3,820         | 122.4 | 43.3            |

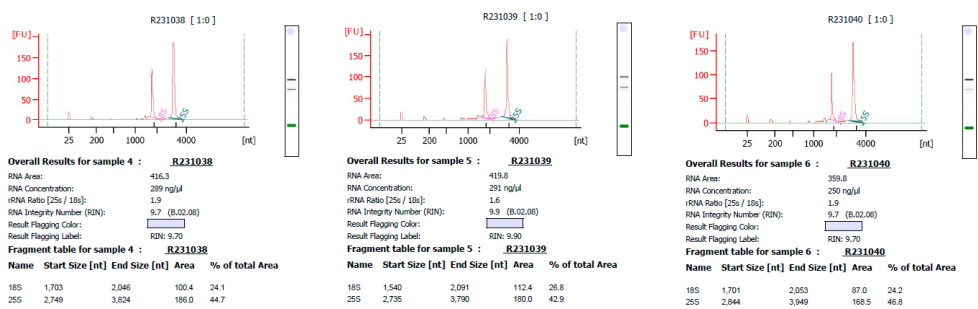

Figure S1. The quality of RNA samples.

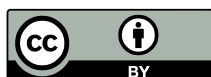

© 2018 by the authors. Licensee MDPI, Basel, Switzerland. This article is an open access article distributed under the terms and conditions of the Creative Commons Attribution (CC BY) license (<http://creativecommons.org/licenses/by/4.0/>).
